# Supplementary material for: Determination of the affinity constants for phage display albumin-binding peptides
Source: PeerJ journal article supplement (doi:10.7717/peerj.15078), 2023-05-22
Supplement: SequenceHSABinder17Dec2020.pdf [file SequenceHSABinder17Dec2020.pdf]

Primers used for sequencing phage display binding peptide

**PIII leader sequence** **Kpn I**

5'...TTA TTC GCA ATT CCT TTA GTG GTA CCT TTC TAT TCT CAC TCT  
3'...AAT AAG CGT TAA GGA AAT CAC CAT GGA AAG ATA AGA GTG AGA  
...*Leu Phe Ala Ile Pro Leu Val Val Pro Phe Tyr Ser His Ser*

↓ Start of mature heptapeptide-gIII fusion **Eag I**

NNK NNK NNK NNK NNK NNK NNK GGT GGA GGT TCG GCC GAA ACT GTT GAA  
NNM NNM NNM NNM NNM NNM NNM CCA CCT CCA AGC CGG CTT TGA CAA CTT  
*Xxx Xxx Xxx Xxx Xxx Xxx Xxx Gly Gly Gly Ser Ala Glu Thr Val Glu*

AGT TGT TTA GCA AAA TCC CAT ACA GAA AAT TCA TTT ACT AAC GTC TGG  
TCA ACA AAT CGT TTT AGG GTA TGT CTT TTA AGT AAA TGA TTG CAG ACC  
*Ser Cys Leu Ala Lys Ser His Thr Glu Asn Ser Phe Thr Asn Val Trp*  
← -28 gIII Primer

AAA GAC GAC AAA ACT TTA GAT CGT TAC GCT AAC TAT GAG GGC...-3'  
TTT CTG CTG TTT TGA AAT CTA GCA ATG CGA TTG ATA CTC CCG...-5'  
*Cys Asp Asp Lys Thr Leu Asp Arg Tyr Ala Asn Tyr Glu Gly*...  
← -96 gIII Primer

**K-G or T;M-A or C**

Figure 3. The N-terminal sequence of seven random peptide-gIII fusion protein

### Sequencing HSA-3 binder Result

CTTTCGGACGTTAGTAAATGAATTTTCTGTATGGGATTTTGCTAAACAAC  
TTTCAACAGTTTCGGCCGAACCTCCACCATTAAGCTTCTAACTCTCCGCA  
GAGTGAGAATAGAAAGGTACCACTAAAGGAATTGCGAATAATAATTTTT  
CACGTTGAAAATCTCCAAAAAAGGCTCCAAAAGGAGCCTTTAATTGTA  
TCGGTTTATCAGCTTGCTTTCGAGGTGAATTTCTTAAACAGCTTGATACC  
GATAGTTGCGCCGACAATGACAACAACCATCGCCACGCATAACCGATAT  
ATTCGGTCGCTGAGGCTTGCAGGGAGTTAAAGGCCGCTTTTGCGGGATCG  
TCACCCTCAGCAGCGAAAGACAGCATCGGAACGAGGGTAGCAACGGCTAC  
AGAGGCTTTGAGGACTAAAGACTTTTTTCATGAGGAAGTTTCCATTAACG  
GGTAAAATACGTAATGCCACTACGAAGGCACCAACCTAAAACGAAAGAGG  
CAAAGAATACACTAAACACTCATCTTTGACCCCCAGCGATTATACCAA  
GCGCGAAACAAAGTACAACGGAGATTTGTATCATCGCCTGATAAATTGTG  
TCGAAATCCGCGACCTGCTCCATGTTACTTAGCCGGAACGAGGCGCAGAC  
GGTCAATCATAAGGGAACCGAACTGACCAACTTTGAAAGAGGACAGATGA  
ACGGTGTACAGACCAGGCGCATAGGCTGGCTGACCTTCATCAAGAGTAAT  
CTTGACAAGAACCGGATATTCATTACCCAATCAACGTAACAAAGCTGCT  
CATTCAAGTGAATAAGGCTTGC

### **GenBank Submissions # 2410423**

-96 gIII Primer sequencing: 5'-ATTAAGCTTCTAACTCTCCGC-3'

HSA-3 DNA: 5'-GCG GAG AGT TAG AAG CTT AAT-3'

HSA-3 peptide: Ala-Glu-Ser-Gln-Lys-Leu-Asn (AESQKLN)

## Sequencing HSA-4 binder Result

CAGACGTTAGTAAATGAATTTTCTGTATGGGATTTTGCTAAACAAC  
TTTCAACAGTTTCGGCCGAA**ACCTCCACCACGCAACGGAAGCGGC**GTAAGA  
GAGTGAGAATAGAAAGGTACCACTAAAGGAATTGCGAATAATAATTTTTT  
CACGTTGAAAATCTCCAAAAAAAAGGCTCCAAAAGGAGCCTTTAATTGTA  
TCGGTTTATCAGCTTGCTTCGAGGTGAATTTCTTAAACAGCTTGATACC  
GATAGTTGCGCCGACAATGACAACAACCATCGCCACGCATAACCGATAT  
ATTCGGTCGCTGAGGCTTGCAGGGAGTTAAAGGCCGCTTTTGCGGGATCG  
TCACCCTCAGCAGCGAAAGACAGCATCGGAACGAGGGTAGCAACGGCTAC  
AGAGGCTTTGAGGACTAAAGACTTTTTTCATGAGGAAGTTTCCATTAAACG  
GGTAAAATACGTAATGCCACTACGAAGGCACCAACCTAAAACGAAAGAGG  
CAAAGAATACACTAAAACACTCATCTTTGACCCCCAGCGATTATACCAA  
GCGCGAAACAAAGTACAACGGAGATTTGTATCATCGCCTGATAAATTGTG  
TCGAAATCCGCGACCTGCTCCATGTTACTTAGCCGGAACGAGGCGCAGAC  
GGTCAATCATAAGGGAACCGAACTGACCAACTTTGAAAGAGGACAGATGA  
ACGGTGTACAGACCAGGCGCATAGGCTGGCTGACCTTCATCAAGAGTAAT  
CTTGACAAGAACCGGATATTCATTACCCAAATCAACGTAACAAAGCTGCT  
CATTCAAGTGAATAAGGCTTGC

## **Genebank Submission # 2411052**

-96 gIII Primer sequencing: 5' **ACGCAACGGAAGCGGC**GTAAG 3'

HSA-4 DNA: 5'-**CTT ACG CCG CTT CCG TTG CGT**-3'

HSA-4 peptide: Leu-Thr-Pro-Leu-Pro-Leu-Arg (ITPLPLR)
