# Supplementary material for: Determination of the affinity constants for phage display albumin-binding peptides
Source: PeerJ. 2023 May 22;11:e15078. doi: 10.7717/peerj.15078 (PMC10215749; doi:10.7717/peerj.15078)
Supplement: Supplemental Information 1 [file peerj-11-15078-s001.docx]

Table 4. HSA-3 phage relative affinity constant measurement (for Figure1.)

| Sample | Input phage titer  ΦT  （pfu/L） | Input phage concentration  [Φ]T  （mol/L） | Elute phage titer  Φe  （pfu/L） | Elute phage concentration  [Φ]e  （mol/L） |
| --- | --- | --- | --- | --- |
| 1 | 1.13×1014 | 5.32×106 | 7.94×106 | 7.58×10-13 |
| 2 | 5.8×1013 | 1.03×107 | 7.5×106 | 7.98×10-13 |
| 3 | 3.36×1013 | 1.79×107 | 5.68×106 | 1.06×10-14 |
| 4 | 2.16×1013 | 2.78×107 | 2.52×106 | 2.39×10-14 |
| 5 | 1.52×1013 | 3.99×107 | 2×106 | 3.03×10-14 |

Table 5. HSA-4 phage relative affinity constant measurement (for Figure 2.)

| 样品 | Input phage titer  ΦT  （pfu/L） | Input phage concentration  [Φ]T  （mol/L） | Elute phage titer  Φe  （pfu/L） | Elute phage concentration  [Φ]e  （mol/L） |
| --- | --- | --- | --- | --- |
| 1 | 5.90×1013 | 1.02×107 | 5.0×106 | 1.2×10-14 |
| 2 | 3.88×1013 | 1.55×107 | 4.32×106 | 1.4×10-14 |
| 3 | 2.93×1013 | 2.05×107 | 2.87×106 | 2.1×10-14 |
| 4 | 2.48×1013 | 2.44×107 | 2.8×106 | 2.2×10-14 |
| 5 | 2.10×1013 | 2.86×107 | 2.16×106 | 2.8×10-14 |
